# Supplementary material for: Association of socioeconomic status with glycated haemoglobin level and risk factors for diabetic retinopathy: a cross-sectional study in Sichuan, western China
Source: HighWire-hosted journal article supplement (doi:10.1136/bmjopen-2022-067475), 2023-02-01
Supplement: bmjopen-2022-067475supp001_data_supplement.pdf [file bmjopen-2022-067475supp001_data_supplement.pdf]

Online supplemental figure 1

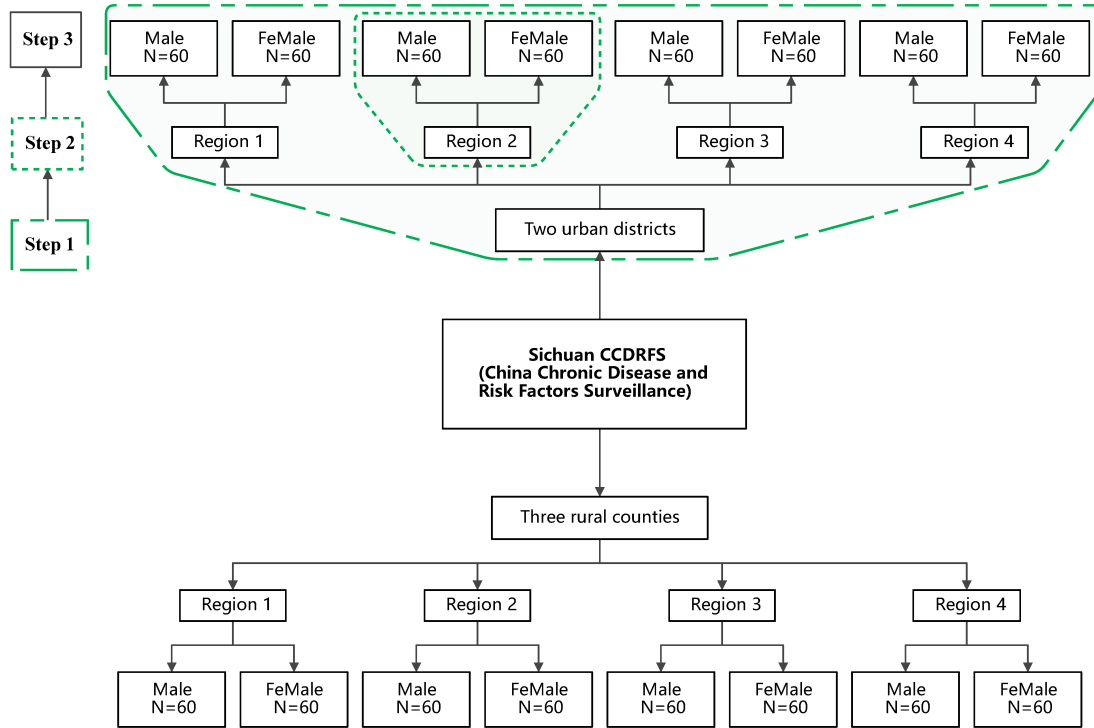

Flow chart of sampling

## Online supplemental table 1

## Univariate Logistic Regression analysis for factors associated with HbA1c level &lt;7%

| Independent variable (reference group)                                | $\beta$ | Standard Error | Wald Chi-Square | p     |
|-----------------------------------------------------------------------|---------|----------------|-----------------|-------|
| <b>Socioeconomic and demographic factors</b>                          |         |                |                 |       |
| Urban areas (ref: rural areas)                                        | 0.73    | 0.09           | 64.35           | <.001 |
| Sex (ref: male)                                                       | 0.19    | 0.09           | 4.51            | 0.034 |
| Age at diabetes diagnosis                                             | 0.02    | 0.00           | 17.89           | <.001 |
| Duration of diabetes                                                  | -0.06   | 0.01           | 17.70           | <.001 |
| Insurance type, UEI group (ref: URI and NCMS group)                   | 0.82    | 0.10           | 71.24           | <.001 |
| Monthly household income per capita (1000 RMB)                        | 0.08    | 0.03           | 6.59            | 0.010 |
| Receiving HbA1c blood test every 3 months (ref: not received)         | 0.44    | 0.10           | 20.44           | <.001 |
| Education level                                                       |         |                |                 |       |
| Middle school education (ref: High school level or higher)            | -0.54   | 0.12           | 18.99           | <.001 |
| Primary school education and below (ref: High school level or higher) | -0.71   | 0.11           | 38.67           | <.001 |
| Family history of diabetes (ref: no history)                          | -0.14   | 0.09           | 2.31            | 0.129 |
| <b>Self-management of diabetes</b>                                    |         |                |                 |       |
| Monitor blood sugar at home (ref: not at home)                        | 0.22    | 0.09           | 5.95            | 0.015 |
| Exercise 30 minutes $\geq$ 1 day per week (ref: unreachd)             | 0.66    | 0.09           | 52.73           | <.001 |
| Follow diet advice of doctors $\geq$ 1 day per week (ref: unreachd)   | 0.56    | 0.11           | 26.73           | <.001 |
| Vegetables and fruit intake <400 grams per day (ref: higher intake)   | -0.43   | 0.09           | 22.93           | <.001 |
| Smoke currently (ref: not currently)                                  | -0.33   | 0.10           | 9.85            | 0.002 |
| <b>Physiological indicators</b>                                       |         |                |                 |       |
| SBP reaching the target value (ref: unreachd)                         | 0.25    | 0.09           | 7.71            | 0.006 |
| DBP reaching the target value (ref: unreachd)                         | 0.15    | 0.10           | 2.46            | 0.117 |
| TC reaching the target value (ref: unreachd)                          | 0.59    | 0.10           | 37.08           | <.001 |
| TG reaching the target value (ref: unreachd)                          | 0.28    | 0.09           | 9.85            | 0.002 |
| HDLC reaching the target value (ref: unreachd)                        | 0.07    | 0.10           | 0.48            | 0.486 |
| LDLC reaching the target value (ref: unreachd)                        | 0.32    | 0.09           | 12.23           | 0.001 |
| BMI/Weight reaching the target value (ref: unreachd)                  | -0.04   | 0.09           | 0.21            | 0.646 |

## Online supplemental table 2

The distribution of previously diagnosed and newly identified DR in different subgroups

|                             |             | Total<br>(No.) | Previously diagnosed DR |                | Newly<br>identified<br>DR (No.) | Awareness<br>rate of DR<br>(%) |
|-----------------------------|-------------|----------------|-------------------------|----------------|---------------------------------|--------------------------------|
|                             |             |                | (No.)                   | Treat rate (%) |                                 |                                |
| Living place                | City        | 134            | 73                      | 36.99          | 61                              | 54.48                          |
|                             | Rural       | 297            | 71                      | 12.68          | 226                             | 23.91                          |
| Gender                      | Female      | 239            | 86                      | 24.42          | 153                             | 35.98                          |
|                             | Male        | 192            | 58                      | 25.86          | 134                             | 30.21                          |
| Insurance                   | UEI         | 74             | 32                      | 40.63          | 42                              | 43.24                          |
|                             | URI or NCMS | 348            | 109                     | 20.18          | 239                             | 31.32                          |
| Test HbA1c every 3 months   | Yes         | 120            | 57                      | 24.56          | 63                              | 47.5                           |
|                             | No          | 311            | 87                      | 25.29          | 224                             | 27.97                          |
| Monitor blood sugar at home | Yes         | 212            | 78                      | 35.9           | 134                             | 36.79                          |
|                             | No          | 219            | 66                      | 12.12          | 153                             | 30.14                          |
| Total                       |             | 431            | 144                     | 25             | 287                             | 33.41                          |
